# Supplementary material
Source: publisher site journal article supplement (https://www.dovepress.com/get_supplementary_file.php?f=346965.xlsx)
Supplement: Supplementary file 1 [file get_supplementary_file.php]

## Sheet: Table S1
accession	title	platform	source	molecule
GSM69481	GEIM1-IBM	GPL96	muscle	total RNA
GSM69482	GEIM7-IBM	GPL96	muscle	total RNA
GSM69483	GEIM20-IBM	GPL96	muscle	total RNA
GSM69484	GEIM27-IBM	GPL96	muscle	total RNA
GSM69485	GEIM36-IBM	GPL96	muscle	total RNA
GSM69486	GEIM38-IBM	GPL96	muscle	total RNA
GSM69487	GEIM54-IBM	GPL96	muscle	total RNA
GSM69488	GEIM61-IBM	GPL96	muscle	total RNA
GSM69489	GEIM62-IBM	GPL96	muscle	total RNA
GSM69490	GEIM67-IBM	GPL96	muscle	total RNA
GSM69491	GEIM79-IBM	GPL96	muscle	total RNA
GSM69492	GEIM83-IBM	GPL96	muscle	total RNA
GSM69493	GEIM91-IBM	GPL96	muscle	total RNA
GSM69494	GEIM112-IBM	GPL96	muscle	total RNA
GSM69495	GEIM127-IBM	GPL96	muscle	total RNA
GSM69496	GEIM167-IBM	GPL96	muscle	total RNA
GSM69497	GEIM169-IBM	GPL96	muscle	total RNA
GSM69498	GEIM170-IBM	GPL96	muscle	total RNA
GSM69499	GEIM180-IBM	GPL96	muscle	total RNA
GSM69500	GEIM183-IBM	GPL96	muscle	total RNA
GSM69501	GEIM223-IBM	GPL96	muscle	total RNA
GSM69502	GEIM237-IBM	GPL96	muscle	total RNA
GSM69503	GEIM251-IBM	GPL96	muscle	total RNA
GSM69510	GEIM45-NORM	GPL96	muscle	total RNA
GSM69511	GEIM50-NORM	GPL96	muscle	total RNA
GSM69512	GEIM57-NORM	GPL96	muscle	total RNA
GSM69513	GEIM63-NORM	GPL96	muscle	total RNA
GSM69514	GEIM110-NORM	GPL96	muscle	total RNA
GSM69515	GEIM128-NORM	GPL96	muscle	total RNA
GSM69516	GEIM133-NORM	GPL96	muscle	total RNA
GSM69517	GEIM176-NORM	GPL96	muscle	total RNA
GSM69518	GEIM186-NORM	GPL96	muscle	total RNA
GSM69519	GEIM193-NORM	GPL96	muscle	total RNA
GSM69520	GEIM218-NORM	GPL96	muscle	total RNA

## Sheet: Table S2
accession	title	platform	source	molecule	disease state	tissue
GSM3676259	Muscle_IBM-001	GPL96	Inclusion body myositis_muscle	total RNA	Inclusion body myositis	Muscle
GSM3676260	Muscle_IBM-007	GPL96	Inclusion body myositis_muscle	total RNA	Inclusion body myositis	Muscle
GSM3676261	Muscle_IBM-020	GPL96	Inclusion body myositis_muscle	total RNA	Inclusion body myositis	Muscle
GSM3676262	Muscle_IBM-027	GPL96	Inclusion body myositis_muscle	total RNA	Inclusion body myositis	Muscle
GSM3676263	Muscle_IBM-036	GPL96	Inclusion body myositis_muscle	total RNA	Inclusion body myositis	Muscle
GSM3676264	Muscle_IBM-038	GPL96	Inclusion body myositis_muscle	total RNA	Inclusion body myositis	Muscle
GSM3676265	Muscle_IBM-061	GPL96	Inclusion body myositis_muscle	total RNA	Inclusion body myositis	Muscle
GSM3676266	Muscle_IBM-062	GPL96	Inclusion body myositis_muscle	total RNA	Inclusion body myositis	Muscle
GSM3676267	Muscle_IBM-067	GPL96	Inclusion body myositis_muscle	total RNA	Inclusion body myositis	Muscle
GSM3676268	Muscle_IBM-079	GPL96	Inclusion body myositis_muscle	total RNA	Inclusion body myositis	Muscle
GSM3676269	Muscle_IBM-083	GPL96	Inclusion body myositis_muscle	total RNA	Inclusion body myositis	Muscle
GSM3676270	Muscle_IBM-091	GPL96	Inclusion body myositis_muscle	total RNA	Inclusion body myositis	Muscle
GSM3676271	Muscle_IBM-112	GPL96	Inclusion body myositis_muscle	total RNA	Inclusion body myositis	Muscle
GSM3676272	Muscle_IBM-167	GPL96	Inclusion body myositis_muscle	total RNA	Inclusion body myositis	Muscle
GSM3676273	Muscle_IBM-169	GPL96	Inclusion body myositis_muscle	total RNA	Inclusion body myositis	Muscle
GSM3676274	Muscle_IBM-170	GPL96	Inclusion body myositis_muscle	total RNA	Inclusion body myositis	Muscle
GSM3676275	Muscle_IBM-173	GPL96	Inclusion body myositis_muscle	total RNA	Inclusion body myositis	Muscle
GSM3676276	Muscle_IBM-175	GPL96	Inclusion body myositis_muscle	total RNA	Inclusion body myositis	Muscle
GSM3676277	Muscle_IBM-180	GPL96	Inclusion body myositis_muscle	total RNA	Inclusion body myositis	Muscle
GSM3676278	Muscle_IBM-183	GPL96	Inclusion body myositis_muscle	total RNA	Inclusion body myositis	Muscle
GSM3676279	Muscle_IBM-185	GPL96	Inclusion body myositis_muscle	total RNA	Inclusion body myositis	Muscle
GSM3676280	Muscle_IBM-203	GPL96	Inclusion body myositis_muscle	total RNA	Inclusion body myositis	Muscle
GSM3676281	Muscle_IBM-223	GPL96	Inclusion body myositis_muscle	total RNA	Inclusion body myositis	Muscle
GSM3676282	Muscle_IBM-232	GPL96	Inclusion body myositis_muscle	total RNA	Inclusion body myositis	Muscle
GSM3676283	Muscle_IBM-237	GPL96	Inclusion body myositis_muscle	total RNA	Inclusion body myositis	Muscle
GSM3676284	Muscle_IBM-251	GPL96	Inclusion body myositis_muscle	total RNA	Inclusion body myositis	Muscle
GSM3676285	Muscle_NL-045	GPL96	Normal_muscle	total RNA	Normal	Muscle
GSM3676286	Muscle_NL-050	GPL96	Normal_muscle	total RNA	Normal	Muscle
GSM3676287	Muscle_NL-057	GPL96	Normal_muscle	total RNA	Normal	Muscle
GSM3676288	Muscle_NL-063	GPL96	Normal_muscle	total RNA	Normal	Muscle
GSM3676289	Muscle_NL-110	GPL96	Normal_muscle	total RNA	Normal	Muscle
GSM3676290	Muscle_NL-128	GPL96	Normal_muscle	total RNA	Normal	Muscle
GSM3676291	Muscle_NL-133	GPL96	Normal_muscle	total RNA	Normal	Muscle
GSM3676292	Muscle_NL-176	GPL96	Normal_muscle	total RNA	Normal	Muscle
GSM3676293	Muscle_NL-186	GPL96	Normal_muscle	total RNA	Normal	Muscle
GSM3676294	Muscle_NL-193	GPL96	Normal_muscle	total RNA	Normal	Muscle
GSM3676295	Muscle_NL-217	GPL96	Normal_muscle	total RNA	Normal	Muscle
GSM3676296	Muscle_NL-218	GPL96	Normal_muscle	total RNA	Normal	Muscle
